# Supplementary material
Source: MDPI journal article supplement (https://www.mdpi.com/2076-3417/12/12/6213)
Supplement: s1 [file s1]

## Supplementary Materials

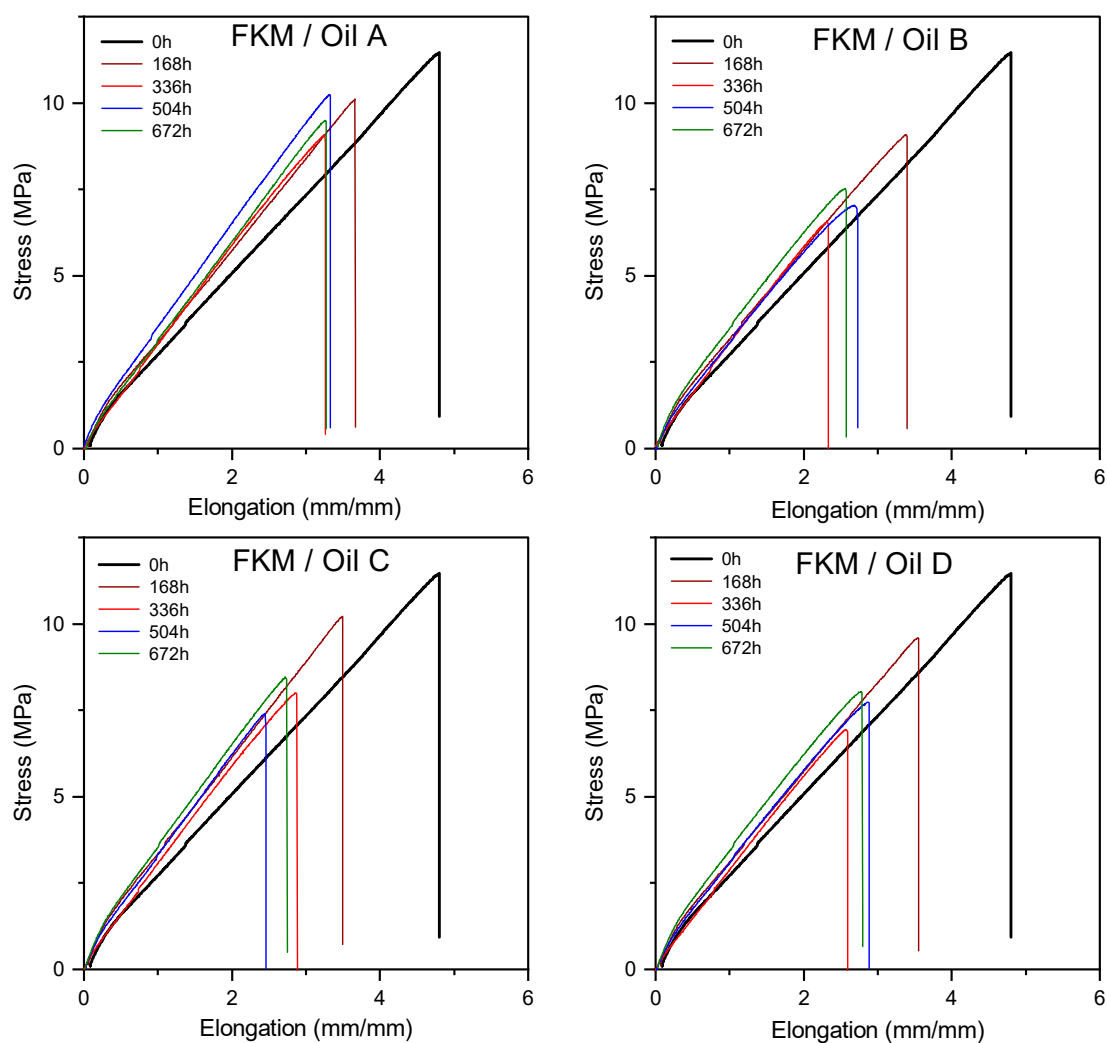

**Figure S1.** Tensile strength and elongation at break for FKM and oils A to D (Fresh and after aging periods of 168, 336, 504, and 672 h).

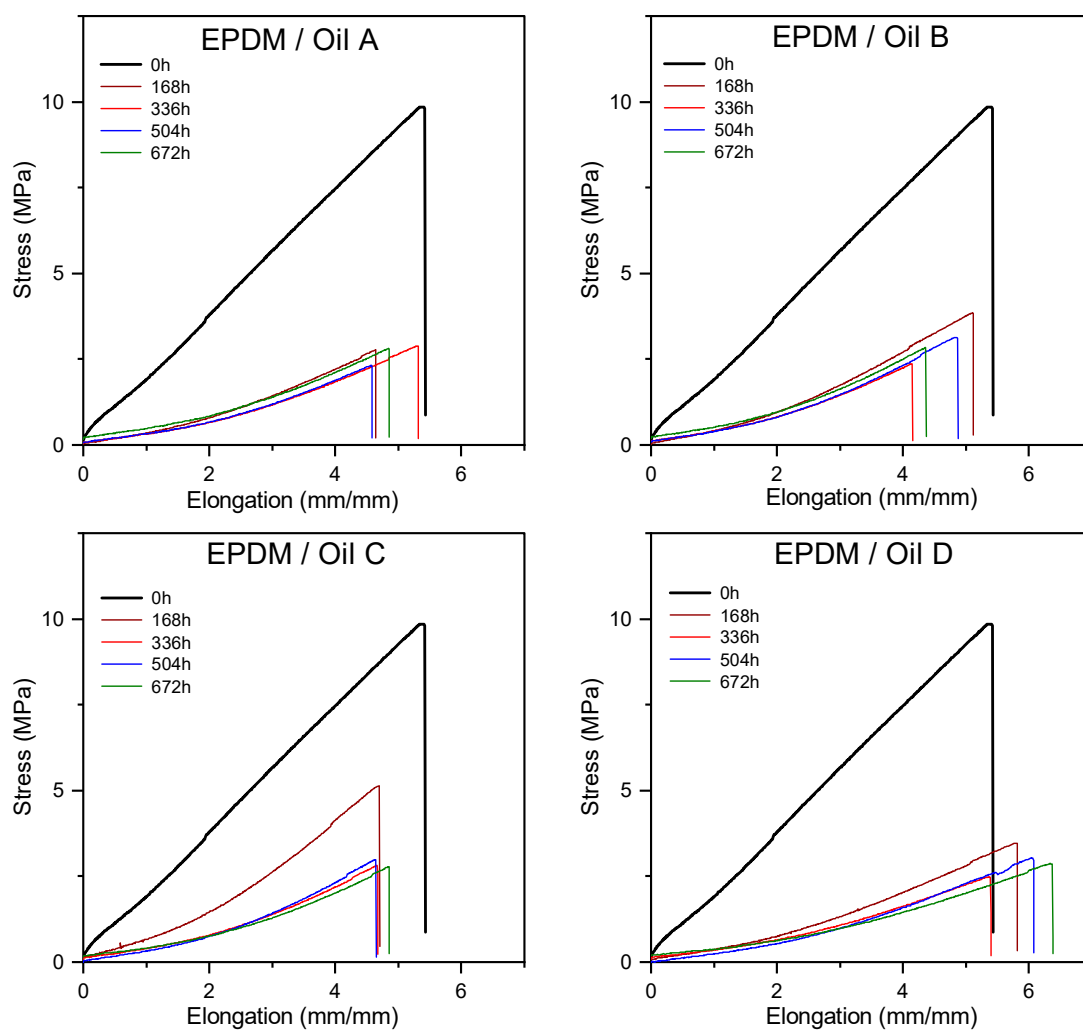

**Figure S2.** Tensile strength and elongation at break for EPDM and oils A to D (Fresh and after aging periods of 168, 336, 504, and 672 h).

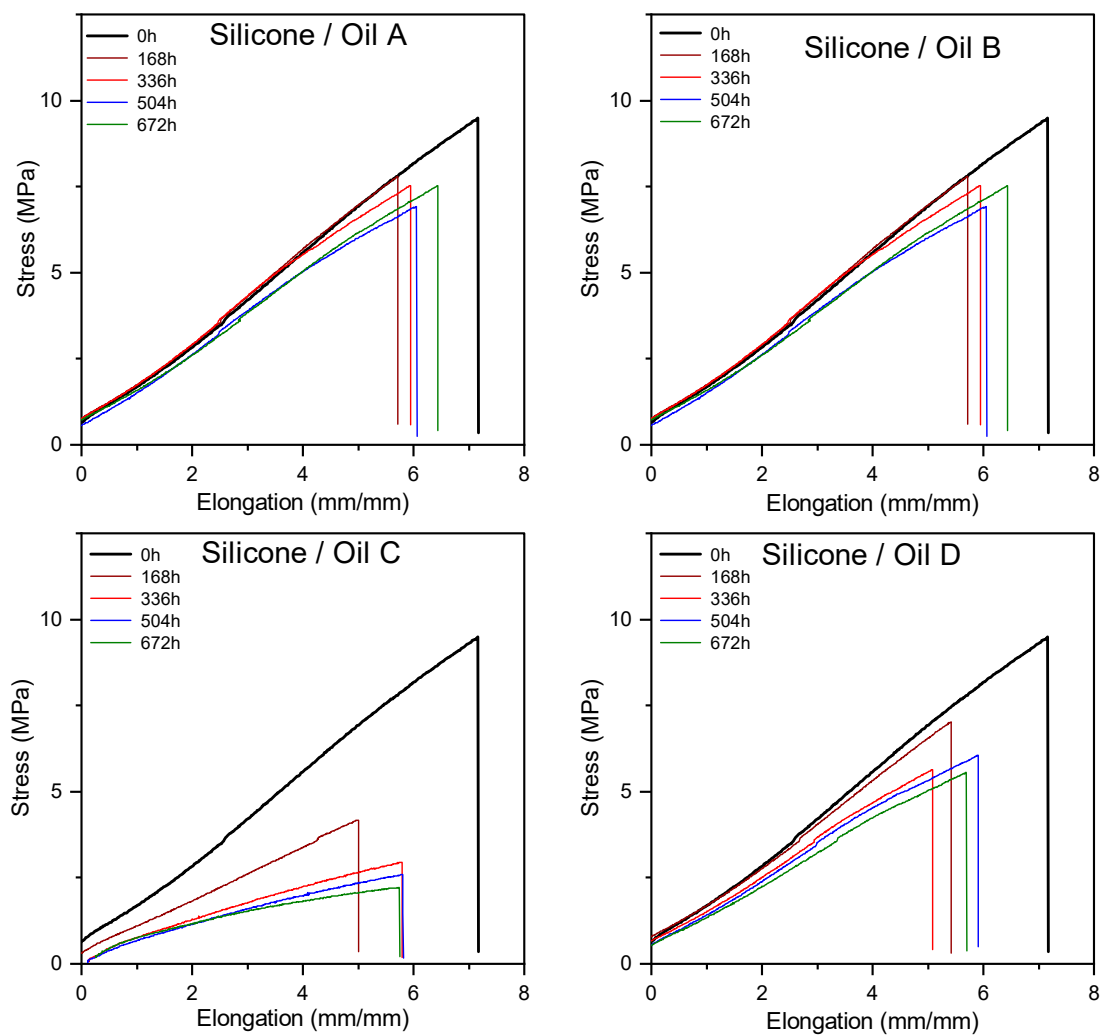

**Figure S3.** Tensile strength and elongation at break for Silicone and oils A to D (Fresh and after aging periods of 168, 336, 504, and 672 h).

**Table S1.** Characteristic FTIR spectra bands for FKM.

| Zone / cm <sup>-1</sup> | Assignment                                                | Fresh   | Oil A -1 w | Oil A -4 w | Oil B -1 w | Oil B -4 w | Oil C -1 w | Oil C -4 w | Oil D -1 w | Oil D -4 w |
|-------------------------|-----------------------------------------------------------|---------|------------|------------|------------|------------|------------|------------|------------|------------|
| 3602 - 3654             | Free O – H [1]                                            | 0.1079  | 0.0008     | 0.2325     | 0.2139     | 0.1692     | 0.1991     | 0.2171     | 0.1918     | 0.1679     |
| 2991 - 3037             | -CH <sub>2</sub> F str. [1]                               | 0.0039  | -0.0256    | 0.0186     | 0.0219     | 0.0205     | 0.0241     | 0.0235     | 0.0067     | 0.0286     |
| 2941 - 2987             | -CH <sub>3</sub> assym. str. [1]                          | 0.1117  | 0.1653     | 0.0312     | 0.0512     | 0.0519     | 0.0454     | 0.0722     | 0.1519     | 0.0278     |
| 2879 - 2941             | -CH <sub>3</sub> symm. str. [1]                           | 0.5166  | 2.1222     | 0.3206     | 0.1112     | 0.4273     | 0.1960     | 0.7526     | 1.4896     | 0.0726     |
| 2802 - 2879             | Acyclic, -CH <sub>2</sub> - sym. str. [1]                 | 0.2614  | 1.0721     | 0.1595     | 0.0549     | 0.2054     | 0.0893     | 0.3437     | 0.7156     | 0.0298     |
| 1709 - 1753             | C=CF <sub>2</sub> str. [1]                                | 0.6231  | 0.0917     | 0.0429     | 0.1334     | 0.0284     | 0.1721     | 0.0718     | 0.1894     | 0.0412     |
| 1680 - 1709             | R <sub>1</sub> R <sub>2</sub> C=CH- str. [1]              | -0.0573 | 0.0311     | 0.0011     | -0.0264    | -0.0083    | -0.0173    | -0.0125    | -0.0178    | 0.0017     |
| 1589 - 1680             | C=C str. [1,2]                                            | 0.5486  | 0.5343     | -0.0076    | -0.0382    | 0.0213     | 0.0396     | -0.0063    | -0.0175    | -0.0140    |
| 1554 - 1589             | Amines, aromatics [1]                                     | 0.0654  | 0.0956     | -0.0086    | -0.0066    | -0.0019    | 0.0067     | 0.0131     | -0.0030    | -0.0053    |
| 1522 - 1554             | Amines, aromatics [1]                                     | 0.1127  | 0.1155     | -0.0648    | -0.0332    | -0.0233    | -0.0190    | -0.0209    | -0.0163    | -0.0359    |
| 1441 - 1498             | -CH <sub>2</sub> - sciss. [1]                             | -0.0018 | 0.0997     | -0.1209    | -0.0366    | -0.0612    | -0.0259    | -0.0162    | 0.0400     | -0.0365    |
| 1412 - 1441             | -CH <sub>3</sub> assym. def. [1]                          | 0.3471  | 0.2582     | 0.5045     | 0.3783     | 0.3695     | 0.3953     | 0.4255     | 0.3283     | 0.3847     |
| 1356 - 1412             | -CH <sub>2</sub> F wag. [1,3]<br>-CF <sub>3</sub> str [2] | 3.6552  | 2.6415     | 3.8813     | 4.3323     | 4.0883     | 4.2786     | 4.2353     | 3.7113     | 4.2697     |
| 1331 - 1356             | C=CF <sub>2</sub> str. [1]                                | 0.1761  | 0.1116     | 0.1928     | 0.2089     | 0.2043     | 0.2104     | 0.2039     | 0.1705     | 0.2156     |
| 1265 - 1308             | Esters, amides [1]                                        | 0.1864  | 0.2069     | 0.2196     | 0.2255     | 0.2082     | 0.2527     | 0.2316     | 0.1874     | 0.2555     |
| 1053 - 1263             | -CF <sub>2</sub> - str [2]                                | 32.7431 | 23.4440    | 35.5248    | 40.3665    | 36.5861    | 40.2121    | 37.6077    | 33.3810    | 38.6870    |
| 953 – 1053              | C-F str in monofluorinated<br>aliphatic groups [1]        | 1.9998  | 2.8331     | 2.2510     | 1.7427     | 1.6400     | 2.1105     | 2.0903     | 1.8208     | 1.8234     |
| 837-895                 | -CF str. [3]                                              | 3.4918  | 3.1477     | 4.8562     | 4.4162     | 4.4728     | 4.4158     | 4.1351     | 3.6158     | 4.4710     |

## References

1. Socrates, G. Infrared and Raman Characteristic Group Frequencies. In *Tables and Charts*; John Wiley & Sons: Hoboken, NJ, USA, 2001; ISBN 978-0-470-09307-8.
2. Kang, H.; Chen, L.; Du, H.; Wang, H.; Li, D.; Fang, Q. Hot Nitric Acid Diffusion in Fluoroelastomer Composite and Its Degradation. *RSC Adv.* **2019**, *9*, 38105–38113. <https://doi.org/10.1039/C9RA06286F>.
3. Mitra, S.; Ghanbari-Siahkali, A.; Kingshott, P.; Almdal, K.; Rehmeier, H.K.; Christensen, A.G. Chemical Degradation of Fluoroelastomer in an Alkaline Environment. *Polym. Degrad. Stab.* **2004**, *83*, 195–206. [https://doi.org/10.1016/S0141-3910\(03\)00235-0](https://doi.org/10.1016/S0141-3910(03)00235-0).
